# Supplementary material for: Transcriptional Regulation of Liver-Type OATP1B3 (Lt-OATP1B3) and Cancer-Type OATP1B3 (Ct-OATP1B3) Studied in Hepatocyte-Derived and Colon Cancer-Derived Cell Lines
Source: MDPI journal article supplement (doi:10.3390/pharmaceutics15030738), 2023-02-23
Supplement: s1 [file s1]

### *Ct-SLCO1B3*

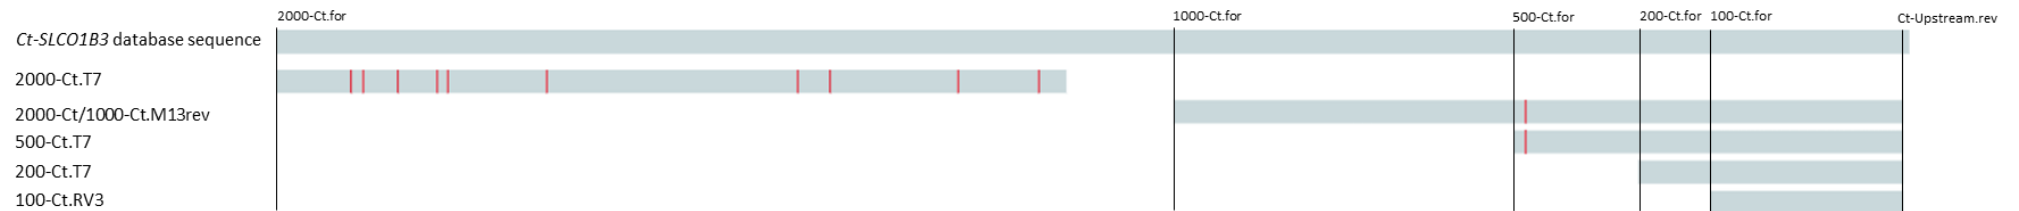

### *Lt-SLCO1B3*

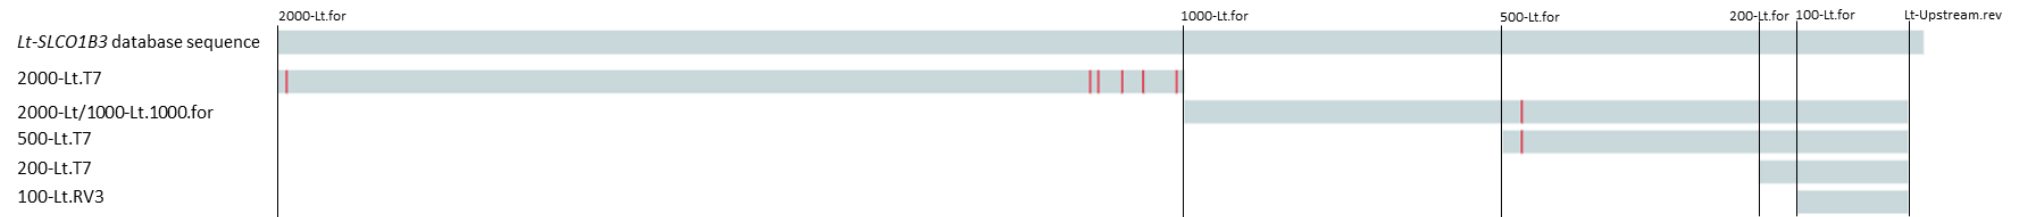

**Figure S1:** DNA sequence analysis

The light blue areas indicate sequence identity with the respective database sequence, red lines show localization of single base pair differences. DNA alignment was performed using the benchling.com web page (<https://benchling.com/>). The sequences used for the alignment are listed below.

*Ct-SLCO1B3* database sequence:

gtggctggggtttgtctcacagtggaggcaaggaattgcaactttgttttattactgtacaccttgaaagtgaggttaattaagtcctgttatgggggt  
ttgaggccagattccaatttttggagttttatattaatgtcaggagcagattgggtaataaaatgtatattgagaataagatggccttttgacctttt  
agggtctagggtgttaaagcatctcagggttgctgccaatgagccatgaactgggctgggttttatattgatgaaaaagagcctaaacgcttc  
tgatttgggataaagaaaaaggagcattaaccttgactatgcctttggctccagccaccttttaagagtaaattgctgggcaggtgggggaggg  
gtagtcattggaacaaaactgtaagccggatcaggtgtgaggaggggagggcgataaaaagtttatagggtggaggagcagaggctgaggaaga  
attgggaactagctcggcctggcgaggaggggagaggtcagatgggtctgtagaaaaggaagattagaaagactcagcgacgcttgggggttg  
gcctgaggggacagcgaggaggaagaaggaagatttgggatgaattgcattgggcagagactaggaagggaactgatgtgtaaaagaatgc  
ctggacatcaggcacctcagaccatttcccgttttacgacaagaattatttaggtctttaggatggaaaaattgaaagtccgtttttctggcaa  
tttgaactactgtcagtttgtactggggcaagcggcattgcagaagaaaaagacgcttagatttttaggtcaggtgagagttgaagaggtttt  
aagttctaagaatacaggctaagggaagaaggaggaatggaaggtggaagctagtcctatagtaaggaggcaagcccagagaaaaagag  
tagagacacggagaagtgatgggggtttcttgcctccagaaaagcagagaaagggttggggcacggaataagggaattgggggttcttccc  
cctagaaaagcgggacttgcactaagggtgaaggagaagggtttaggggtacttgcctcccccagaaaagcagagaagggttagagac  
atggagagaagggttgggtacttgcctcccccagaaaagcgggacttgcggctaagggtgaaggaccaaggcaggcatcctgcgtggt  
ctgacacctttgaaatgtgggtgaataatcagagaggcatcctgcaatgattaaacaccaagggaaggctgcttcccagtcctgacggcac  
cggagttttgggtccacggataaaacatgtctcttctcctatccgaaaatgaaaggaattgaaattaagagaaggagagattgaagtgtgg  
tgtcaagattgaaaggagaagaggtttagggatagtgaaaggaagtggaagaagagagtaaaaaggccgcttaccggattgaaattgtg  
agatgtttcttgggctggtcggtctgaggacctgaggtcgtagatggatctttctcacggagcaaagagcaggaggacgggggattgatctcca  
agggaggtccccgatccaagtcacggcaccaaatttcatgtgtgtccatgtgaagagaccaccaaacaggctttgtgtgagcaataaagctgtt  
tatttcacctggatcggttgggctgagtcgaaaagagagtcagtgaaaggagataagggtggggcgttttataggatttgggaaggtaaag  
gaaaattacagtcaaagggttgttctctggtgggcaggggagggggtcacaaggtgctcggtgggggagcttctgagccaggagaaggaaa  
ttcaaagggttagtcactcagtttaagggtgggcaggaacaaatcacaatggtggaatgtcatcagtttaaggcggggcagggcctttcacttcttt  
gtgattcttcagttacttcaggccatctcggcgtatagtcgaagtcacaggggatgggatggcttggcttgggctcagagacctgacagtggcaa  
tgtatggccacgttactgaatctacatgttgcaagagaaaaactagcaggttaagggaatggtcagttatttattg

2000-Ct.T7

ggcggccctgatgcatgctcagcgcccgaggtgtgatggatatctgcagaattcgccctttggaggcaaggaattgcaactttgttttattactg  
tacaccttgaaagtgaggttaattaagtcctgttatgggggtttagggccagattccaattttgggggtttatattaatgtcgggagcagattgggta  
ataaaatgtatattgagaataagatggcctttgaccttttagggctagggctgtaaagcatctcagggttgctgccgagtgagccatgaactggc  
tgggtttttatatttgatgaaaaagagcctaaacgcttctgatttgggataaagaaaaaggagcattaaccttgactatgcctttggctccagccac  
cttttaagagtaaattgctgggcaggttggggaggggtagtcatggaacaaaactgtaagccggatcaggtgtgaggaggggagggcgataaa  
aagtttatagggtggaggagcagaggctgaggaagaattgggaactagctcggcctggcgaggaggggagaggtcagatgggtctgtagaaa  
aggaagattagaaagactcagcgacgcttgggggtgggcctgaggggacaggcgggagggaaagaagggaagatttgggatgaattgcattgg  
gcagagactaggaagggaactgatgtgtaaaagaatgcctggacatcaggcacctcagaccatttcccgttttacgacgagaattatttaggtct  
tgtaggatggaaaaattgaaagtctgttttctggcaatttgaactactgtcagtttgtactggggtcaagcggcattgcagaagaaaaaga  
cgcttagatttttaggtcaggtgagagttgaagaggttttaagttctaagaatacaggctaagggaagaaggaggaatggaaggtggaagct  
agcccatagtgaaaggaggcaagcccagagaaaagagtagagacaggagaagtgatgggggtttcttgcctccagaaaagcagagaaagg  
gttggggcacggaatgagggttgggggttcttgcctccagaaaagcggga

2000-Ct/1000-Ct.M13rev

taactgaccattcccttacctgtagtttttcttgaacatgtagattcagtaacgtggccatacattgccactgtcaggtctctgagcccaagcc  
aagccatccatcccctgtgacttcacgtatacggagatggcctgaagtaactgaagaatcacaaaagaagtgaaggccctgccccgct  
taactgatgacattccaccattgtgattgttctgccccacctaactgagtgactaacctttgaatttcttctctggctcagaagctccccac  
cgagcaccttgtgacccccgcccctgccaccagagaaacaccccccttgactgtaatttctttaccttccaaatcctataaaacggccccacc  
cttatctccttactgactcttttctgactcagcccaaccgcatcagggtgaataaacagctttattgtcacacaaagcctgtttggtggtctc  
ttcacgtggacacacatgaaatttgggtccgtgacttggatcgggggacctcccttgggagatcaatccccgtctctctgtcttctcgtgag  
aaagatccatctacgacctcaggtctcagaccgaccagcccaagaaacatctaccaatttcaaaccggtaagcggcctttttactctctct  
ccaacttcttactatccctcaaccttcttcttcaatcttgacaccacacttcaatctctcccttcttcaatttcaatttcttcttctcgata

gagacaaaggagacatgttttatccgtggacccaaaactccgggtgccgggtcacggactgggaaggcagccttcccttggtgtttaatcattgcag  
ggatgcctctctgattattcacccacatttcaaagggtgtcagaccacgcagggatgcctgccttggtccttc

500-Ct.T7

ttcattgtgtgtccacgtgaagagaccaccaaacaggctttgtgtgagcaataaagctgtttatttcacctggatgcggttgggctgagtcgaaaa  
gagagtcaagtgaaggagataaagggtggggccgttttataggatttgggaaggtaaaggaaaattacagtcaaagggggtgttctctggtggg  
caggggcgggggtcacaagggtctcgggtgggggagcttctgagccaggagaaggaaattcaaagggtagtcaactcagttaagggtggggcagg  
aacaatcacaatgggtggaatgtcatcagttaaggcggggcagggcctttcacttctttgtgattcttcagttacttcaggccatctcggcgatac  
gtgcaagtcacaggggatgggatggcttggcttgggctcagagacctgacagtggcaatgtatggccacgttactgaatctacatgttgcaagag  
aaaaactagcaggttaagggaatggtcagtta

200-Ct.T7

cagtcaaagggggtgttctctggtgggcaggggcgggggtcacaagggtctcgggtgggggagcttctgagccaggagaaggaaattcaaagg  
gttagtcaactcagttaagggtgggcaggaacaaatcacaatgggtgaatgtcatcagttaaggcggggcagggcctttcacttctttgtgattctt  
cagttacttcaggccatctcggcgatacgtgcaagtcacaggggatgggatggcttggcttgggctcagagacctgacagtggcaatgtatggc  
cacgttactgaatctacatgttgcaagagaaaaactagcaggttaagggaatggtcagtta

100-Ct.RV3

taactgaccattcccttacctgctagttttcttgaacatgtagattcagtaacgtggccatacattgccactgtcaggtctctgagcccaagcc  
aagccatcccatcccctgtgacttgcacgtatacgcgagatggcctgaagtaactgaagaatcacaaaagaagtgaaggccctgccccgcct  
taactgatgacattccaccattgtgatttctcctgccccacctaactgagtgactaa

*Lt-SLCO1B3* database sequence

acttagaaaatttatactgctgtcaagtagcagagacattggtatcaaagtttatcaaactcaaagcccataatatttcacagaaactgtgatgat  
tattgcggcaacaacagcagattgttttaagcaaatgttgagttgtattgatccacagctgttagcataatatttatcttgaaaaaagtgttgca  
atgtgtttcctctgaccactcttatttttccacaagtcacacaaaaagggaagtctaattacttacataggaagaaaaaagggcacagagaatgc  
tctttgacttctgaaaacattccagaattttaccactgatagcgttagtttagggattagaaagtttctcagtgcatttgtactattttatcttattct  
atgcatgtatttgcctaaatgaaattgatgtgtctgaatgaaatggatgtgtgaggagaaaaccattagcatgagaatatccaaactgtcttcc  
catttgaataaaaagaaaagccataaaactgataattaatgttttagtatctctgctatgatgttctcaaagctgacagtatgtaaaaattattct  
aagtgttatttaaaaagcataatctccgaactcgtgaatcagaatctcttgggtgtggggctggatcgacttttgacaaaggctcccagtaga  
tttgactcaacagaggggtgttgggagcctatatctaattttccctgccccaggtctacacttcagtgttccccacattttctaactcttctccct  
ccacactccggttctttcattattctaatacttccatgaattaaccagggtatagaactaatctaggctgggcgcagtggtcagcctgtaatccta  
gcactttgggaggccgaggtgggcagatcacgaggtcaggagatcgagaccatcctggctaacatgggtgaaacccgtcttactaaaaatacg  
aaaaaattagccggcggtgtggcgggcgctttagtgccagctactcgggagactgaggcaggagaatggcgtgaacccgggaggcgagct  
tgcaagtgcagcgagatcgtgccgtgactccagcctgggtgacagagcaagactccgtctcaaaaaaaaaaaaaaaaaactagtttatcaata  
actgtgatatagaaattaaatacatattgctgcaactgtatcaacaactgtcctgtcagtgataaggggtaacaatgttttcatacatgattctctc  
tttgctataatacacacatacacataaatacatatacacatacactcatgcatgtgtgtatatacatgtgagagaagactccgtttattat  
ttatatttttatagtacacttctaaacacagccatgtgcctgagatatagtagggagtcaaatatgtttgagttactgaattaattaatttgactca  
tccttactcaagaaaagtttcaactgagtgagggtcttccattctctaaagagcaagtaatagaaggagatcatttctctttacacattgatgta  
aggaatatatcatacaaaactagcttgtattttgtcatttagaagactagcttgttaattaattggcaatttagtattccatgtgagatatccagtgc  
catgtacgtcatatttagatccatacacatgtaacaagcaaaagggtatgtttatttttgatgctaataatgtaacatgtagggacattttaaaaaa  
tcgcttgacatattttctattttggaatagttttaatactttggataatgtgtgtattgtatttctaagaagaaaaatcttatgcaaccaactta  
tgaataagaaataaatcattcccagaaataatttttctaattgtaacataatgtgtacattctgagaaattattaataaaatgtttaaaagata  
ggcttctgggtgtaactcctagaattagctaggtatgtttttctgttgcctaggacaatgacctaaataagatggtaatacatcattggactcataa  
aaacaacaaataaaaaagccaactaaccatttaaagtgcagctttaaactcagaaaaaggatggacttgttcagttgtgtgacattcaaggt  
caag

2000-Lt.T7

ggccgccttgatgcatgctcgagcgccgcccagtgatggatatctgcagaattcgcccttgagtgattgattcacagctgtagcataatat  
ttatcttgaaaaaagtgttgcaatgtgttctctgaccactcttattttccacaagtcccacaaaaagggaagtctaattacttacataggaag  
aaaaaagggcacagagaatgctcttgacttctgaaaacattccagaattttaccactgatagcgtagtttagggattagaaagtttctcagtg  
atgtgtactattttcttctcattctatgcatgtatttgtcccaaatgaaattgatgtgtcttgatgaaatggatgtgtgaggagaaaaccattagcat  
gagaatatccaaactgtcttcccattctgaataaaaagaaaagccataaaactgataattaatgttttagtatctctgcatgatggttctcaaaagct  
gacagtatgtaaaaattattctaagtgttattttaaagcataatctccgaactcgtaatcagaatctcttgggtgtggggctggatcgacttt  
tgacaaaggctccccagtagattttagtcaacagagggtgttgggagcctatatctaattttccctgccccaggtctacacttcagtggtccca  
cattttctaactcttctctccctccacactccggttctttcattattctaatacttccatgaattaaccaggtagaactaatctaggctgggcgca  
gtggctcacgcctgtaactctagcactttgggaggccgaggtgggcagatcacgaggtcaggagatcgagaccatctggctaactgggtgaaa  
ccccgtctctactaaaaatacgaaaaaattagccgggctgtgtggcggcgctgttagtgccagctactcgggagactgaggcaggagaatggc  
gtgaaccgggaggcgagcttgcatgagccgagatcgtgccgtgcactccagcctgggtgacagagcaagactccgtctcaaaaaaaac  
aaaaaactagtttcaataaactgtgaatagaaattaaatacatattgtgtaactgtatcaacaactgtcctgtcagtgataaggggtaacatg  
ttttca

2000-Lt/1000-Lt.1000.for

tacatgcattctcttcttgctatatacacatacacataaatacatatatacacatacactcatgcatgtgtgtgtatatacatgtgagagaa  
gactccggtttattatttatattttatagtagcacttctaaaacacagccatgtgcctgagatatagtagggagtcaaatatgtttgagtactgaatta  
attaattgacttcatccttactcaagaaaagttcaactgagtgaaaggtcttccattcttaaagagcaagtcaatagaaggagatcattcttctt  
tacacattgatgtaaggaatatatcataaaactagctttagttttgtcatttagaagactagtcttgaattaattggcaatttagtattccatgtg  
agatatccagtgtccctgtacgtcatattagatccatacacatgtaacaagcaaagggtatgttttttttgaatgctaattgaacatgtagg  
gacattttaaaaaatcgcttgacatattttctatttgaatagttttaatacttggataatgtgttgatttgaatttctaaagaagaaaatctt  
gcaaccaacttaattgaataagaataaatcattcccagaaataatttttctaattgtaacataatgtgtacattctgagaaattattaataaa  
atgtttaaaagataggcttctggggtgaactcctagaattagctaggtagtttttctgttgcctaggacaatgacctaataagatggtaacat  
cattggactcataaaaaacaaataaaaaagccaactaaccatttaaagttagactttaacatcagaaaaaggatggacttgttcagttgc

500-Lt.T7

gcaactgcaacaagtccatccttttctgatgttaaagtctcactttaaatggtagttggctttttattgtttgtttttatgagtccaatgatgattaa  
ccatcttatttaggtcattgtcctaggcaaacagaaaaaacatacctagctaattctaggagttcacccagaagcctatcttttaaacattttatta  
ataatttctcagaatgtacacattatgttaacattagaaaataaattatttctgggaatgatttatttcttattcaattaagttgggtgcataagattt  
cttcttttagaaatacaataacacattatccaaagtattttaaactattccaaatagaaaatatgtcaaggcgattttttaaagtgcctacat  
gttacattagcattcaaaaaataaacataccctcttgcctgttacatgtgtatggatctaatatgacgtacagggacactggatatctcacatgg

200-Lt.T7

gcaactgcaacaagtccatccttttctgatgttaaagtctcactttaaatggtagttggctttttattgtttgtttttatgagtccaatgatgattaa  
ccatcttatttaggtcattgtcctaggcaaacagaaaaaacatacctagctaattctaggagttcacccagaagcctatc

100-Lt.RV3

ctgtttgcctaggacaatgacctaataagatgggttaatcatcattggactcataaaaaacaaataaaaaagccaactaaccatttaaagtgag  
actttaacatcagaaaaaggatggacttgttcagttgc
